# Supplementary material for: Identification of Burkholderia gladioli pv. cocovenenans in Black Fungus and Efficient Recognition of Bongkrekic Acid and Toxoflavin Producing Phenotype by Back Propagation Neural Network
Source: MDPI journal article supplement (doi:10.3390/foods13020351), 2024-01-22
Supplement: s1 [file s1]

**Table S1** Bacterial species identified based on 16S rRNA gene and its acquired GeneBank accession numbers.

| Strain | Sample                  | Organism                     | Per. Identity | GenBank    |
|--------|-------------------------|------------------------------|---------------|------------|
| NC1    | Black fungus            | <i>Burkholderia gladioli</i> | 97.01%        | OP984839.1 |
| NC2    | Black fungus            | <i>Burkholderia gladioli</i> | 99.86%        | OP984840.1 |
| NC3    | Black fungus            | <i>Burkholderia gladioli</i> | 99.58%        | OP984841.1 |
| NC4    | Black fungus            | <i>Burkholderia gladioli</i> | 99.51%        | OP984842.1 |
| NC5    | Ground rain water       | <i>Burkholderia gladioli</i> | 99.51%        | OP984843.1 |
| NC6    | Ground rain water       | <i>Burkholderia gladioli</i> | 99.58%        | OP984844.1 |
| NC9    | Black fungus            | <i>Burkholderia gladioli</i> | 99.51%        | OP984845.1 |
| NC10   | Black fungus            | <i>Burkholderia gladioli</i> | 99.51%        | OP984846.1 |
| NC11   | Black fungus            | <i>Burkholderia gladioli</i> | 99.51%        | OP984847.1 |
| NC12   | Black fungus            | <i>Burkholderia gladioli</i> | 99.58%        | OP984852.1 |
| NC13   | Black fungus            | <i>Burkholderia gladioli</i> | 99.58%        | OP984853.1 |
| NC14   | Black fungus            | <i>Burkholderia gladioli</i> | 99.23%        | OP984854.1 |
| NC15   | Black fungus            | <i>Burkholderia gladioli</i> | 99.23%        | OP984855.1 |
| NC16   | Black fungus            | <i>Burkholderia gladioli</i> | 99.65%        | OP984848.1 |
| NC17   | Black fungus            | <i>Burkholderia gladioli</i> | 99.58%        | OP984849.1 |
| NC18   | Black fungus            | <i>Burkholderia gladioli</i> | 99.51%        | OP984861.1 |
| NC19   | Black fungus            | <i>Burkholderia gladioli</i> | 99.72%        | OP984851.1 |
| NC20   | Sun-curing black fungus | <i>Burkholderia gladioli</i> | 99.58%        | OP984856.1 |
| NC21   | Sun-curing black fungus | <i>Burkholderia gladioli</i> | 99.58%        | OP984857.1 |
| NC22   | Sun-curing black fungus | <i>Burkholderia gladioli</i> | 99.30%        | OP984858.1 |
| NC23   | Sun-curing black fungus | <i>Burkholderia gladioli</i> | 99.58%        | OP984859.1 |
| NC24   | Sun-curing black fungus | <i>Burkholderia gladioli</i> | 98.33%        | OP984860.1 |
| NC25   | Sun-curing black fungus | <i>Burkholderia gladioli</i> | 99.58%        | OP984861.1 |
| NC27   | Sun-curing black fungus | <i>Burkholderia gladioli</i> | 99.72%        | OP984863.1 |
| NC28   | Sun-curing black fungus | <i>Burkholderia gladioli</i> | 99.58%        | OP984864.1 |
| NC29   | Sun-curing black fungus | <i>Burkholderia gladioli</i> | 99.44%        | OP984865.1 |

Note that the sequences were submitted and deposited in Genebank in National Center for Biotechnology Information data base(<https://www.ncbi.nlm.nih.gov/>).

**Table S2** Reference STs in geoBURST analysis.

| id   | isolate             | country        | source        | atpD | gltB | gyrB | recA | lepA | phaC | trpB | ST   |
|------|---------------------|----------------|---------------|------|------|------|------|------|------|------|------|
| 916  | AU10372             | USA            | CF patient    | 223  | 308  | 404  | 254  | 303  | 214  | 261  | 554  |
| 992  | 3676                | Czech Republic | CF patient    | 223  | 308  | 404  | 254  | 303  | 268  | 261  | 629  |
| 1522 | CF120               | Germany        | CF patient    | 223  | 337  | 492  | 312  | 360  | 269  | 312  | 656  |
| 1634 | AU14120             | USA            | CF patient    | 223  | 309  | 624  | 374  | 360  | 269  | 416  | 901  |
| 1635 | AU14319             | USA            | CF patient    | 223  | 337  | 625  | 375  | 360  | 225  | 417  | 902  |
| 1753 | BCC0238             | USA            | CF patient    | 223  | 429  | 651  | 387  | 436  | 225  | 428  | 946  |
| 1754 | BCC0252             | Australia      | CF patient    | 223  | 308  | 652  | 254  | 303  | 214  | 261  | 947  |
| 1760 | BCC1620             | USA            | CF patient    | 223  | 432  | 655  | 254  | 303  | 333  | 261  | 951  |
| 1761 | BCC1621             | USA            | CF patient    | 223  | 308  | 626  | 254  | 303  | 214  | 417  | 903  |
| 1765 | BCC1645             | Australia      | environmental | 223  | 308  | 626  | 254  | 303  | 214  | 417  | 903  |
| 1766 | BCC1646             | India          | environmental | 223  | 435  | 655  | 254  | 303  | 334  | 261  | 954  |
| 1768 | BCC1648             | USA            | environmental | 223  | 308  | 626  | 254  | 303  | 214  | 417  | 903  |
| 1769 | BCC1649             | Zimbabwe       | environmental | 223  | 436  | 655  | 312  | 360  | 269  | 312  | 956  |
| 1992 | VC17927             | Canada         | CF patient    | 223  | 308  | 626  | 254  | 303  | 214  | 417  | 903  |
| 1995 | VC17964             | Canada         | CF patient    | 223  | 308  | 626  | 254  | 303  | 214  | 417  | 903  |
| 1996 | VC17963             | Canada         | CF patient    | 223  | 308  | 655  | 254  | 303  | 214  | 261  | 971  |
| 2010 | VC18110             | Canada         | CF patient    | 223  | 308  | 652  | 254  | 303  | 214  | 261  | 947  |
| 2011 | VC18109             | Canada         | CF patient    | 223  | 308  | 626  | 254  | 303  | 214  | 417  | 903  |
| 2024 | VC18242             | Canada         | CF patient    | 223  | 454  | 655  | 254  | 303  | 214  | 261  | 1081 |
| 2029 | GIMC4595:Bgd-sp17P3 | Russia         | CF patient    | 223  | 308  | 626  | 254  | 303  | 214  | 417  | 903  |
| 2451 | R-16098             | Belgium        | CF patient    | 223  | 308  | 655  | 254  | 303  | 214  | 261  | 971  |
| 2468 | QLD127              | Australia      | CF patient    | 433  | 308  | 626  | 502  | 303  | 214  | 417  | 1358 |

|      |                      |                    |                         |     |     |      |     |     |     |     |      |
|------|----------------------|--------------------|-------------------------|-----|-----|------|-----|-----|-----|-----|------|
| 2780 | VC17613              | Canada             | CF patient              | 365 | 440 | 654  | 392 | 449 | 335 | 432 | 999  |
| 2781 | VC17964              | Canada             | CF patient              | 223 | 308 | 626  | 254 | 303 | 214 | 417 | 903  |
| 2782 | VC18208              | Canada             | CF patient              | 365 | 437 | 654  | 391 | 439 | 335 | 433 | 1507 |
| 2783 | VC18990              | Canada             | CF patient              | 223 | 309 | 657  | 390 | 360 | 225 | 428 | 955  |
| 2784 | VC19126              | Canada             | CF patient              | 223 | 337 | 625  | 375 | 360 | 225 | 417 | 902  |
| 2785 | VC17517              | Canada             | CF patient              | 223 | 308 | 664  | 254 | 303 | 334 | 261 | 1508 |
| 2786 | VC17878              | Canada             | CF patient              | 372 | 308 | 670  | 254 | 303 | 214 | 261 | 1004 |
| 2787 | VC18700              | Canada             | CF patient              | 223 | 437 | 492  | 312 | 445 | 269 | 312 | 1509 |
| 2789 | VC19143              | Canada             | CF patient              | 506 | 440 | 986  | 390 | 624 | 225 | 612 | 1527 |
| 2885 | SCCH17:Bgd823231     | Russia             | CF patient              | 223 | 308 | 626  | 254 | 303 | 214 | 417 | 903  |
| 2886 | SCCH11:Bgd82340      | Russia             | CF patient              | 223 | 308 | 404  | 254 | 303 | 268 | 261 | 629  |
| 2887 | GIMC4605:Bgd-sp12R21 | Russia             | CF patient              | 223 | 308 | 660  | 254 | 303 | 214 | 261 | 965  |
| 3114 | PP-BB2452            | Pakistan           | hospital<br>environment | 223 | 437 | 1061 | 312 | 360 | 484 | 312 | 1622 |
| 3563 | R-10361              | USA                | CF patient              | 223 | 431 | 1120 | 396 | 440 | 269 | 312 | 1732 |
| 3571 | R-23387              | The<br>Netherlands | environmental           | 223 | 308 | 626  | 254 | 303 | 214 | 417 | 903  |
| 4292 | AU0368               | USA                | CF patient              | 223 | 337 | 665  | 749 | 440 | 225 | 430 | 1963 |
| 4299 | AU3366               | USA                | CF patient              | 223 | 436 | 417  | 312 | 360 | 269 | 435 | 1968 |
| 4337 | AU35178              | USA                | CF patient              | 223 | 308 | 404  | 254 | 303 | 268 | 261 | 629  |
| 4341 | AU35657              | USA                | CF patient              | 223 | 885 | 655  | 254 | 303 | 214 | 261 | 1982 |
| 4355 | AU38680              | USA                | CF patient              | 223 | 309 | 665  | 390 | 360 | 269 | 428 | 1010 |
| 4360 | AU39558              | USA                | CF patient              | 223 | 337 | 1270 | 388 | 624 | 269 | 428 | 1988 |
| 4362 | AU39681              | USA                | CF patient              | 223 | 433 | 624  | 388 | 360 | 225 | 430 | 952  |
| 4370 | AU40190              | USA                | CF patient              | 223 | 308 | 404  | 254 | 303 | 214 | 261 | 554  |
| 4373 | AU40524              | USA                | CF patient              | 223 | 308 | 404  | 254 | 303 | 214 | 417 | 991  |

|      |                   |                 |                |     |     |      |     |     |     |     |      |
|------|-------------------|-----------------|----------------|-----|-----|------|-----|-----|-----|-----|------|
| 4376 | AU41704           | USA             | CF patient     | 223 | 890 | 1273 | 388 | 360 | 653 | 209 | 1992 |
| 4377 | AU41714           | USA             | CF patient     | 223 | 308 | 626  | 254 | 303 | 214 | 417 | 903  |
| 4378 | AU41816           | USA             | CF patient     | 223 | 437 | 655  | 254 | 303 | 214 | 261 | 1993 |
| 4379 | AU42016           | USA             | CF patient     | 223 | 309 | 624  | 374 | 360 | 269 | 416 | 901  |
| 4447 | AU35053           | USA             | CF patient     | 223 | 437 | 668  | 387 | 360 | 269 | 428 | 2025 |
| 4606 | BGC01             | China           | environmental  | 223 | 437 | 492  | 388 | 441 | 269 | 417 | 2108 |
| 4607 | BGC02             | China           | environmental  | 223 | 931 | 679  | 312 | 441 | 269 | 417 | 2109 |
| 4608 | BGC03             | China           | environmental  | 365 | 440 | 677  | 392 | 439 | 335 | 433 | 2110 |
| 4609 | BGC04             | China           | environmental  | 223 | 308 | 417  | 265 | 318 | 225 | 312 | 2111 |
| 4610 | BGC05             | China           | environmental  | 365 | 440 | 1318 | 780 | 884 | 335 | 433 | 2112 |
| 4611 | BGC06             | China           | environmental  | 365 | 932 | 1061 | 779 | 439 | 225 | 433 | 2113 |
| 4612 | BGC07             | China           | environmental  | 365 | 437 | 659  | 391 | 439 | 335 | 433 | 2114 |
| 4613 | BGC08             | China           | environmental  | 365 | 440 | 1061 | 779 | 439 | 335 | 433 | 2115 |
| 4614 | BGC09             | China           | environmental  | 223 | 431 | 492  | 265 | 360 | 269 | 209 | 2116 |
| 4615 | BGC10             | China           | environmental  | 223 | 931 | 679  | 312 | 441 | 269 | 417 | 2109 |
| 4616 | BGC11             | China           | environmental  | 365 | 440 | 1061 | 779 | 439 | 335 | 433 | 2115 |
| 4617 | BGC12             | China           | environmental  | 365 | 437 | 624  | 391 | 439 | 335 | 433 | 2117 |
| 4651 | SCCH61:Bgd92-3601 | Russia [Europe] | CF patient     | 223 | 308 | 664  | 254 | 893 | 214 | 261 | 2141 |
| 4656 | IH241             | Chile           | non-CF patient | 223 | 931 | 655  | 312 | 318 | 269 | 312 | 2145 |

Note that the sequences were submitted and deposited in Public Databases for Molecular Typing and Microbial Genome Diversity (<https://pubmlst.org/>).

**Table S3** Reference strains in BP neural network prediction model.

| Strain name | Strain Details                                                | Accession (PacBio)        | MLST sequence type | Bongkreikic acid | Toxflavin |
|-------------|---------------------------------------------------------------|---------------------------|--------------------|------------------|-----------|
| BCC1650     | <i>B. gladioli</i> pv. <i>cocovenenans</i> , Indonesia        | <a href="#">ERS784828</a> | 957                | +                | +         |
| BCC1661     | CF Isolate, USA                                               | <a href="#">ERS784861</a> | 959                | +                | +         |
| BCC1665     | CF Isolate, USA                                               | <a href="#">ERS784925</a> | 963                | +                | +         |
| BCC1675     | CF Isolate, USA                                               | <a href="#">ERS785062</a> | 970                | +                | +         |
| BCC1678     | CF Isolate, USA                                               | <a href="#">ERS784880</a> | 973                | +                | +         |
| BCC1689     | CF Isolate, USA                                               | <a href="#">ERS784865</a> | 993                | +                | +         |
| BCC1692     | CF Isolate, USA                                               | <a href="#">ERS784914</a> | 983                | +                | +         |
| BCC1697     | CF Isolate, USA                                               | <a href="#">ERS784984</a> | 989                | +                | +         |
| BCC1701     | CF Isolate, USA                                               | <a href="#">ERS784867</a> | 993                | +                | +         |
| BCC1710     | CF Isolate, USA                                               | <a href="#">ERS785039</a> | 999                | +                | +         |
| BCC1735     | CF Isolate, USA                                               | <a href="#">ERS785008</a> | 1019               | +                | +         |
| BCC1647     | <i>B. gladioli</i> pv. <i>gladioli</i> , LMG 6882, USA        | <a href="#">ERS784943</a> | 955                | -                | +         |
| BCC0771     | <i>B. gladioli</i> pv. <i>gladioli</i> , LMG 2216             | <a href="#">ERS784806</a> | 557                | -                | +         |
| BCC1649     | <i>B. gladioli</i> pv. <i>gladioli</i> , LMG 6880t4, Zimbabwe | <a href="#">ERS784812</a> | 956                | -                | +         |
| BCC1648     | <i>B. gladioli</i> pv. <i>alliicola</i> , LMG 2121, USA       | <a href="#">ERS784957</a> | 903                | -                | +         |
| BCC1645     | <i>B. gladioli</i> pv. <i>alliicola</i> , LMG 6954, Australia | <a href="#">ERS784911</a> | 903                | -                | +         |
| BCC1646     | <i>B. gladioli</i> pv. <i>alliicola</i> , LMG 6878, India     | <a href="#">ERS784928</a> | 954                | -                | +         |

Note that the sequences used were searched from Public Databases for Molecular Typing and Microbial Genome Diversity (<https://pubmlst.org/>).

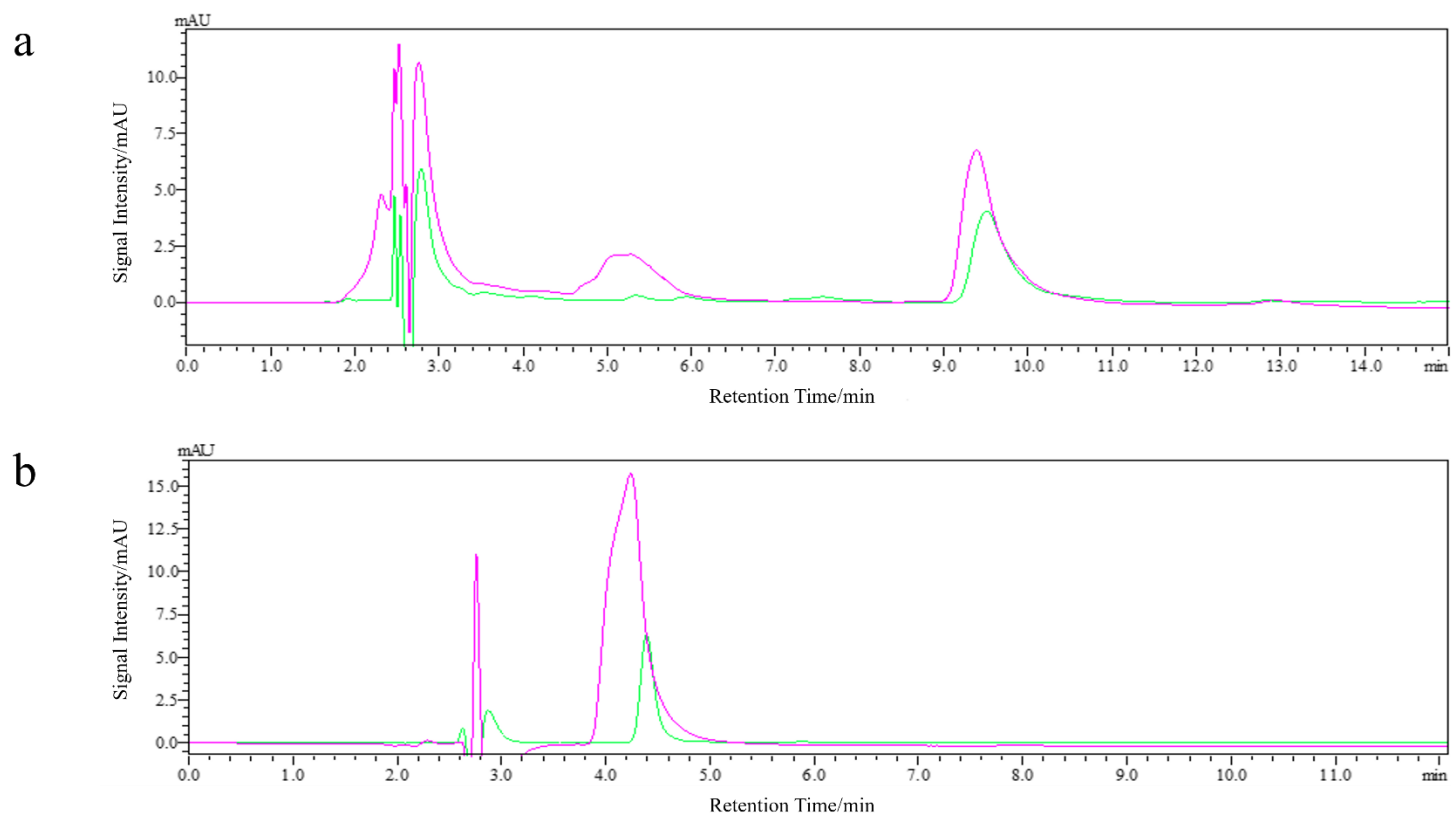

**Figure S1** The ultraperformance liquid chromatograms of bongkreikic acid and toxoflavin. Bongkreikic acid were in a and toxoflavin were in b, the purple was standard solution at 5 mg/L and the green were toxins produced by NC18.
